# Supplementary material
Source: PubMed Central journal article supplement (PMC4852710)

**Fig. S1****A**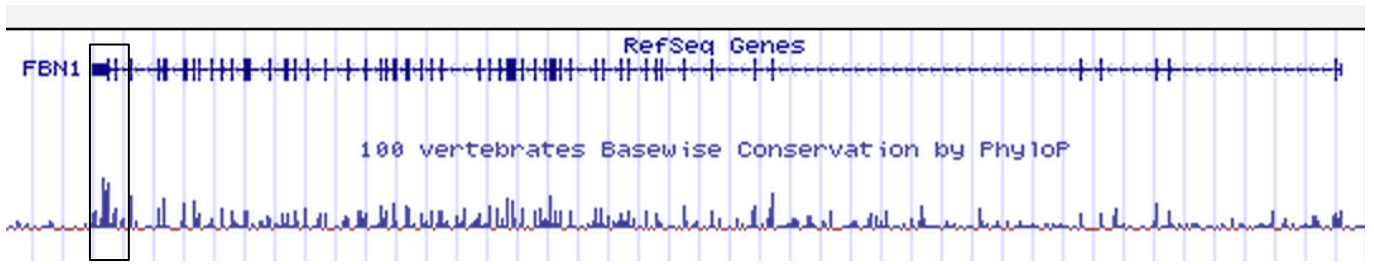**B**

**Asprosin Coding Region Conservation**

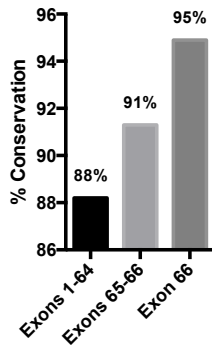**C**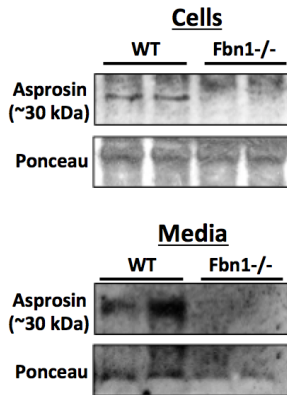**D**

**Asprosin N-linked Glycosylation**

NetNGlyc 1.0 Server (<http://www.cbs.dtu.dk/services/NetNGlyc/>)

**STNETDASNIEDQSETEANVSLASWDVEKTAIFAFNISHVSNKVRILELLPALTTLTNHNRYLIESGNEDGFFKINQREGISYLHFTKKKPVAGTYSLQISSTPLYKKKELNQLQLEDKYDKDYLSGELGDNLMKMKIQVLLH\***

**E**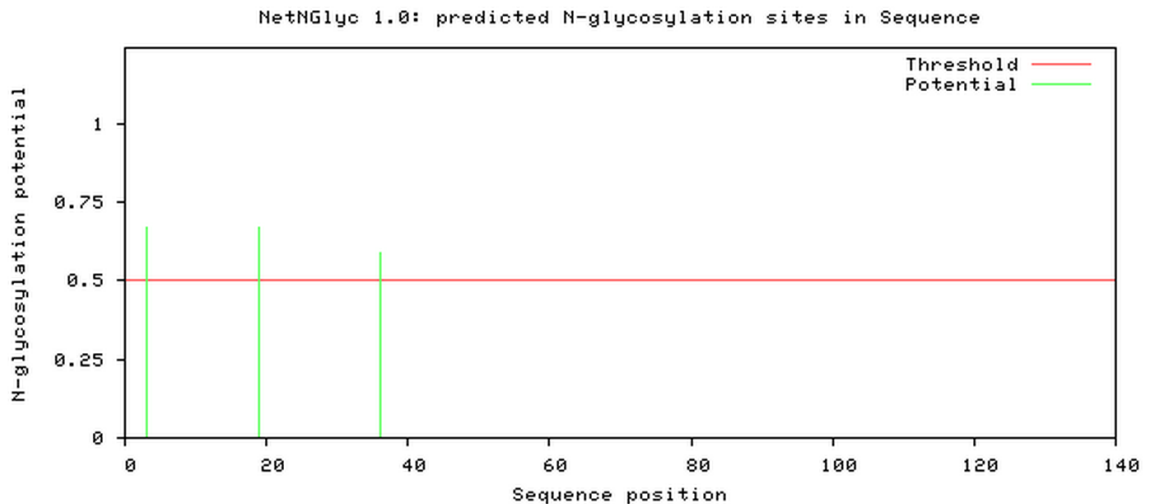

Supplement: NIHMS765464-supplement-1.pdf [file NIHMS765464-supplement-1.pdf]
