# Supplementary material
Source: PubMed Central journal article supplement (PMC4852710)

**Fig. S2**

**A**

Mouse White Adipose Tissue

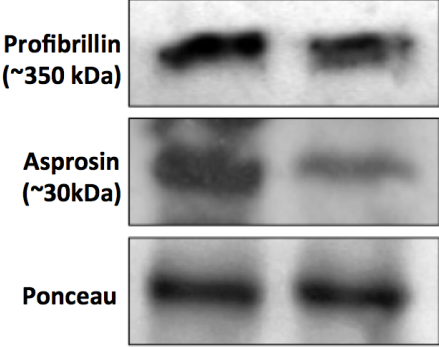

**B**

Cell Lysate

Preadipocytes    Adipocytes

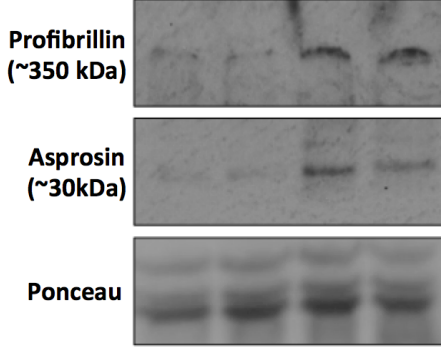

Supplement: NIHMS765464-supplement-2.pdf [file NIHMS765464-supplement-2.pdf]
