# Supplementary material
Source: PubMed Central journal article supplement (PMC4852710)

Fig. S3

A

Detection Antibody Epitope  
HHHHHHSTNETDASNIEDQSETEANVSLASWDVEKTAIFAFNISHVSNKVRILELLPALTTLTNHNRYLIE  
SGNEDGFPKINQKEGISYLFHTKKKPVAGTYSLQISSTPLYKKKELNQLQLEDKYDKDYLSGELGDNLKMKIQ  
VLLH\*  
Capture Antibody Epitope

B Fbn1 mRNA

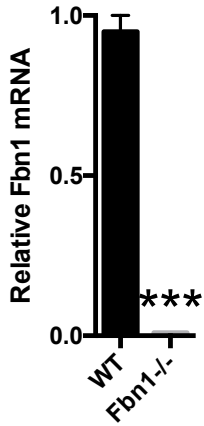

C Media Asprosin

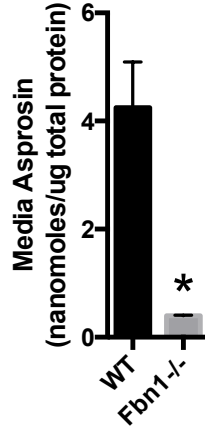

D Hepatocyte Glucose Production

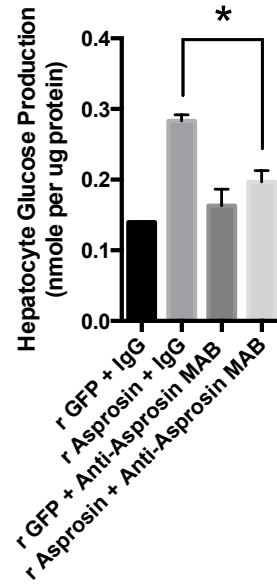

E  $\Delta$ FBN1 Expression

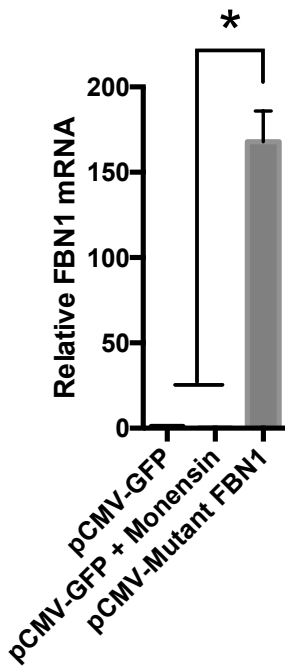

F Media Asprosin

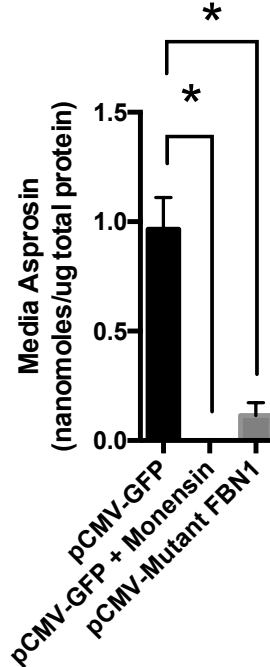

Supplement: NIHMS765464-supplement-3.pdf [file NIHMS765464-supplement-3.pdf]
