# Supplementary material
Source: PubMed Central journal article supplement (PMC4852710)

**Fig. S4**

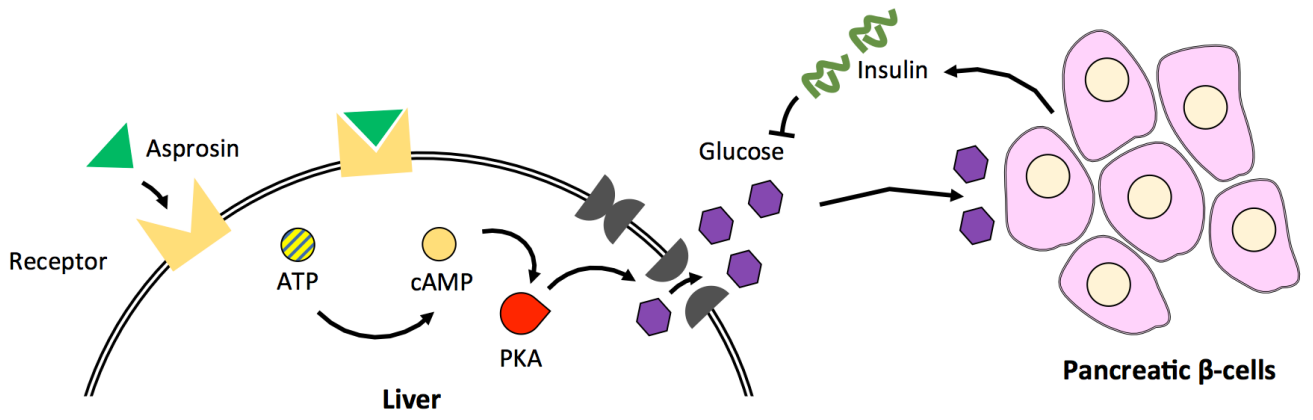

Supplement: NIHMS765464-supplement-4.pdf [file NIHMS765464-supplement-4.pdf]
