# Supplementary material
Source: PubMed Central journal article supplement (PMC4852710)

**Fig. S5**

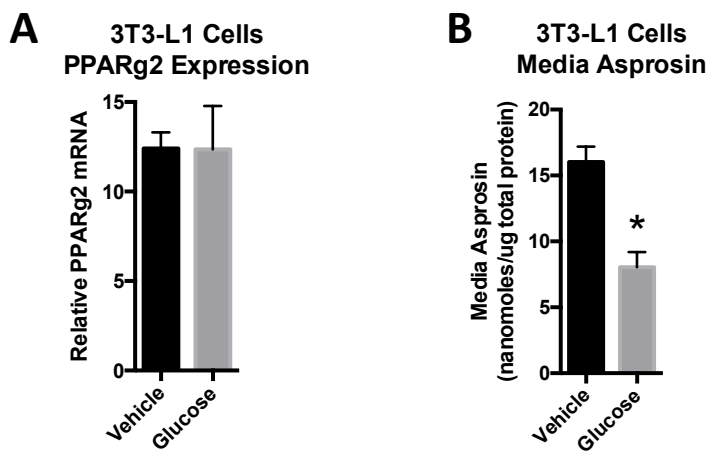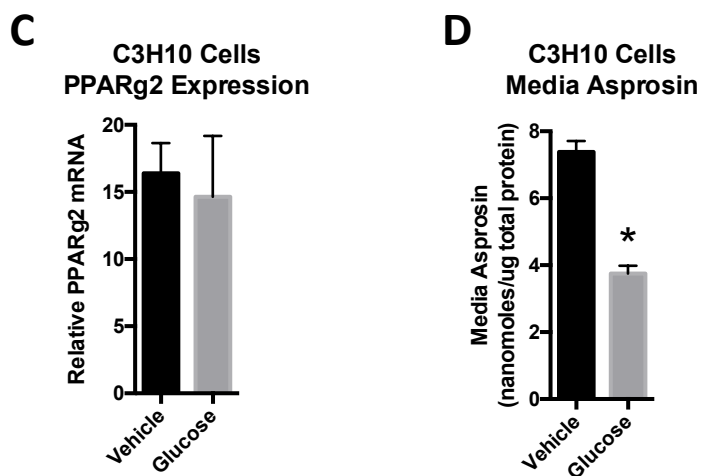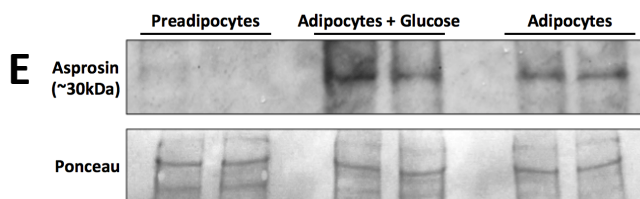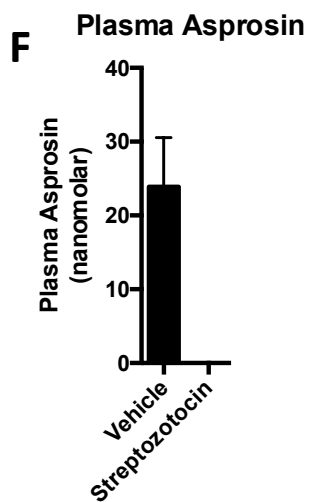

Supplement: NIHMS765464-supplement-5.pdf [file NIHMS765464-supplement-5.pdf]
