# Supplementary material
Source: PubMed Central journal article supplement (PMC4852710)

**Fig. S6**

**A**

**Fbn1 Exon 66  
Expression  
FBN1<sup>-/-</sup> MEFs**

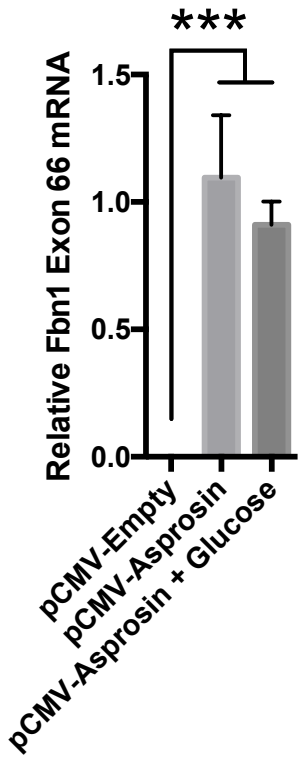

**B**

**Media Asprosin  
FBN1<sup>-/-</sup> MEFs**

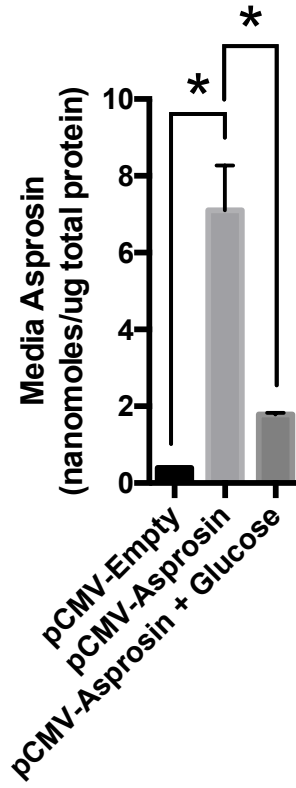

Supplement: NIHMS765464-supplement-6.pdf [file NIHMS765464-supplement-6.pdf]
