# Supplementary material
Source: PubMed Central journal article supplement (PMC4852710)

**Fig. S7**

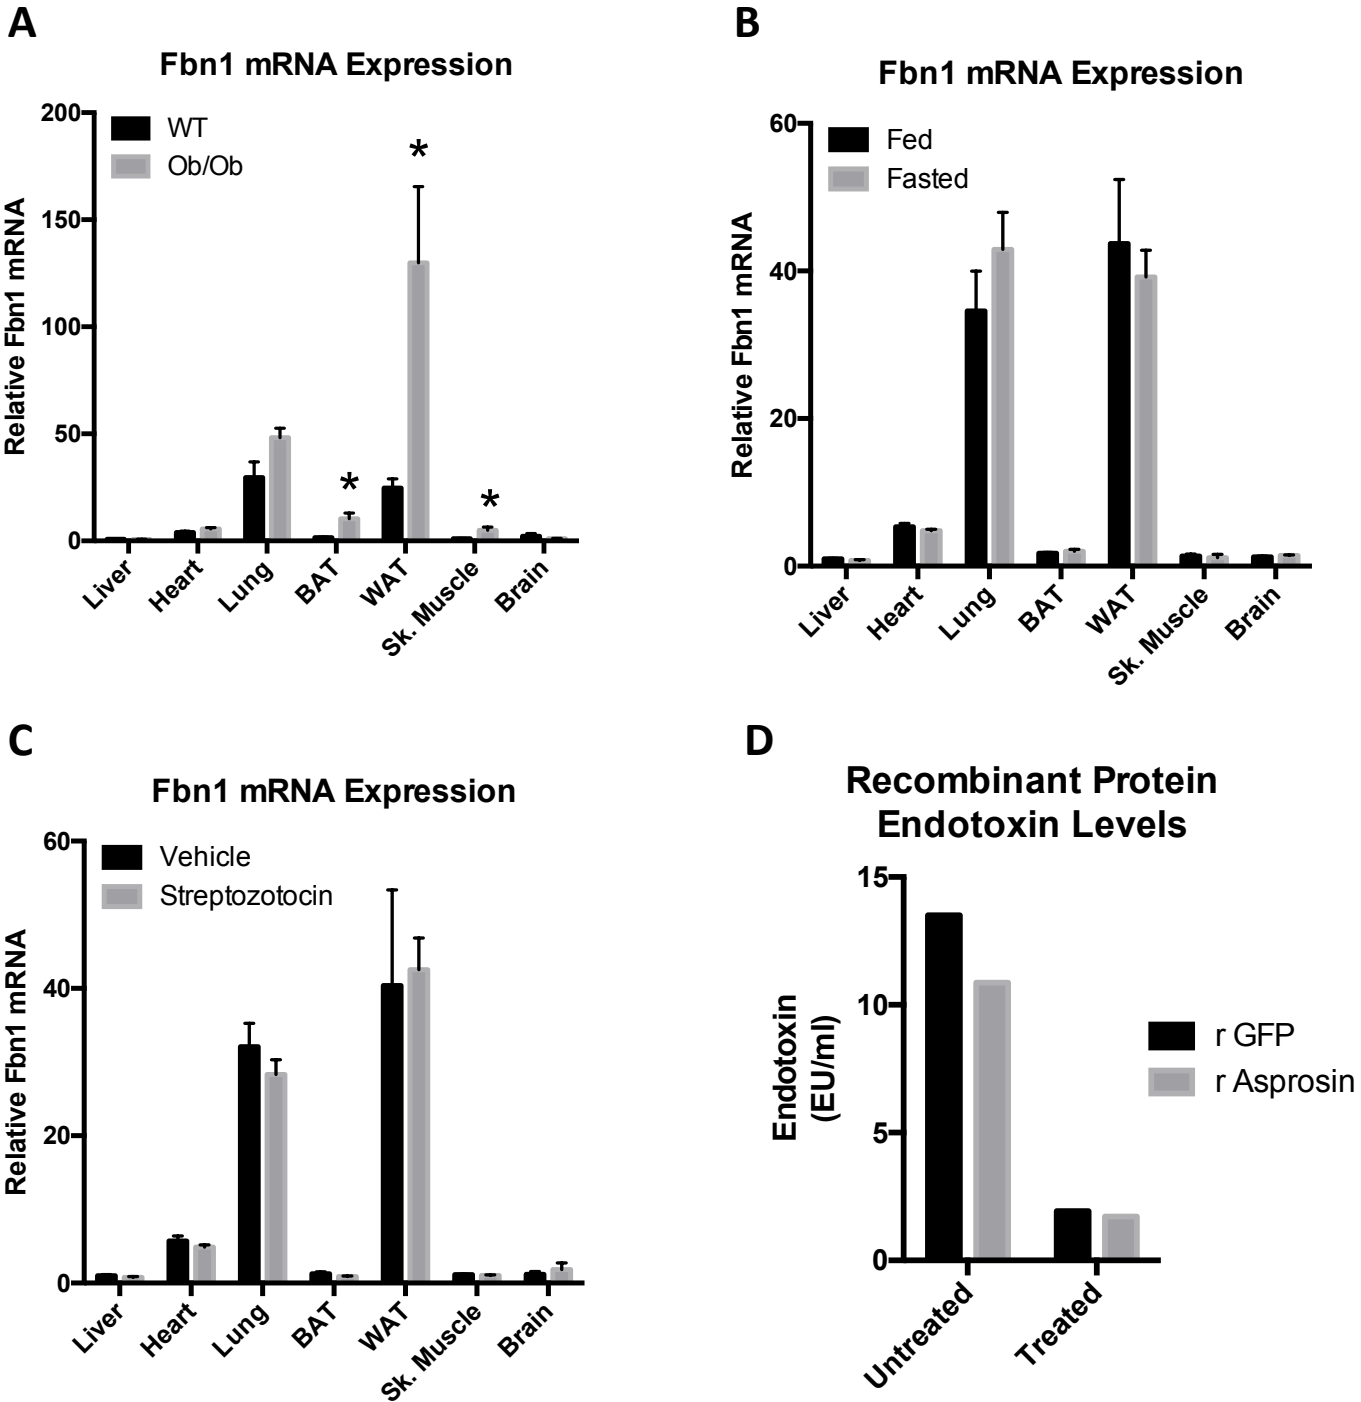

Supplement: NIHMS765464-supplement-7.pdf [file NIHMS765464-supplement-7.pdf]
